# Supplementary material for: Polymer-Coated Daikon-Based Sunlight Absorbers for Highly Efficient Interface Solar Steam Generation
Source: Preprints.org preprint supplement (doi:10.20944/preprints202203.0232.v1), 2022-03-16
Supplement: Supplementary file 3 [file supplementary]

Supporting Information

**Polymer-coated daikon-based sunlight absorbers for highly efficient interface solar steam generation**

Ming Lia, b, #**, Zhenning Zhang** a, b, **#, Fan Yang**a, b**, Bo Wu**a, b**, Jie Yi**a, b**, Zhihui Yang**a, b**, Yuming Wu**a, b**, Weiming Wang** a, b**, Shuai Peng** a, b**, Jun Xiong** a, b**, *, Xue Min** a, b,*****

1College of Chemistry and Chemical Engineering, Wuhan Textile University, Wuhan, China

2Hubei Key Laboratory of Biomass Fibers and Eco-dyeing & Finishing, Wuhan Textile University, Wuhan, China

#These authors contributed equally to this work and should be considered co-first authors

*****Corresponding authors:

**E-mail addresses: jxiong@wtu.edu.cn (Jun Xiong);** [xmin@wtu.edu.cn](mailto:xmin@wtu.edu.cn) **(Xue Min).**

**Characterization**

SEM was characterized through JEOL InTouchScope (JSM-IT500) SEM. XRD patterns were carried out on a Rigaku Ultima IV diffractometer with a Cu Kα radiation source. XPS analysis was detected on a Kratos Axis Ultra with a Delay Line Detector photoelectron spectrometer utilizing an aluminum monochromatic X-ray source. FT-IR spectra were recorded by a Thermos Nicolet FT-IR spectrophotometer (model 6700). UV-Vis-NIR spectra were measured by Solid Spec-3700 Shimadzu. SCAs were performed on a contact angle meter (OAC20, DaraPhysics) through the static sessile drop method. The concentrations of Na+, Mg2+, K+, Ca2+, Fe3+ and Cu2+ were detected by inductively coupled plasma-mass spectroscopy (ICP-MS) using Agilent 7700. UV-vis absorption spectra were carried out on TU-1950 Persee. The simulated solar intensity was calibrated by PL-MW2000 optical density meter from Perfectlight.


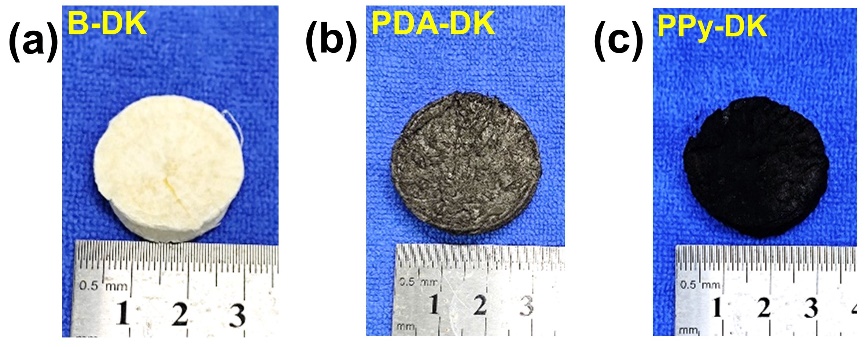


**Figure S1**. Photograph and diameter of (a) B-DK; (b) PDA-DK; (c) PPy-DK.


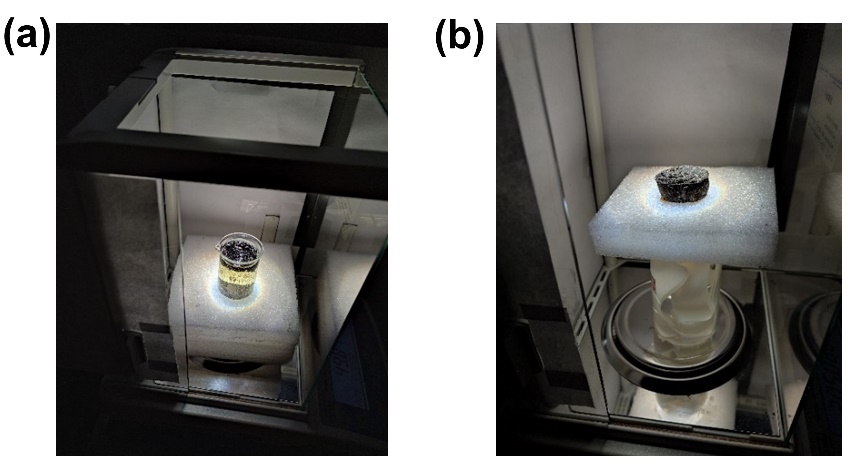


**Figure S2.** (a) The diagram of PPy-DK was direct put on the bulk water for solar steam generation; (b) the diagram of polyethylene foam (PEF) as insulating layer in PPy-DK system for solar steam generation.


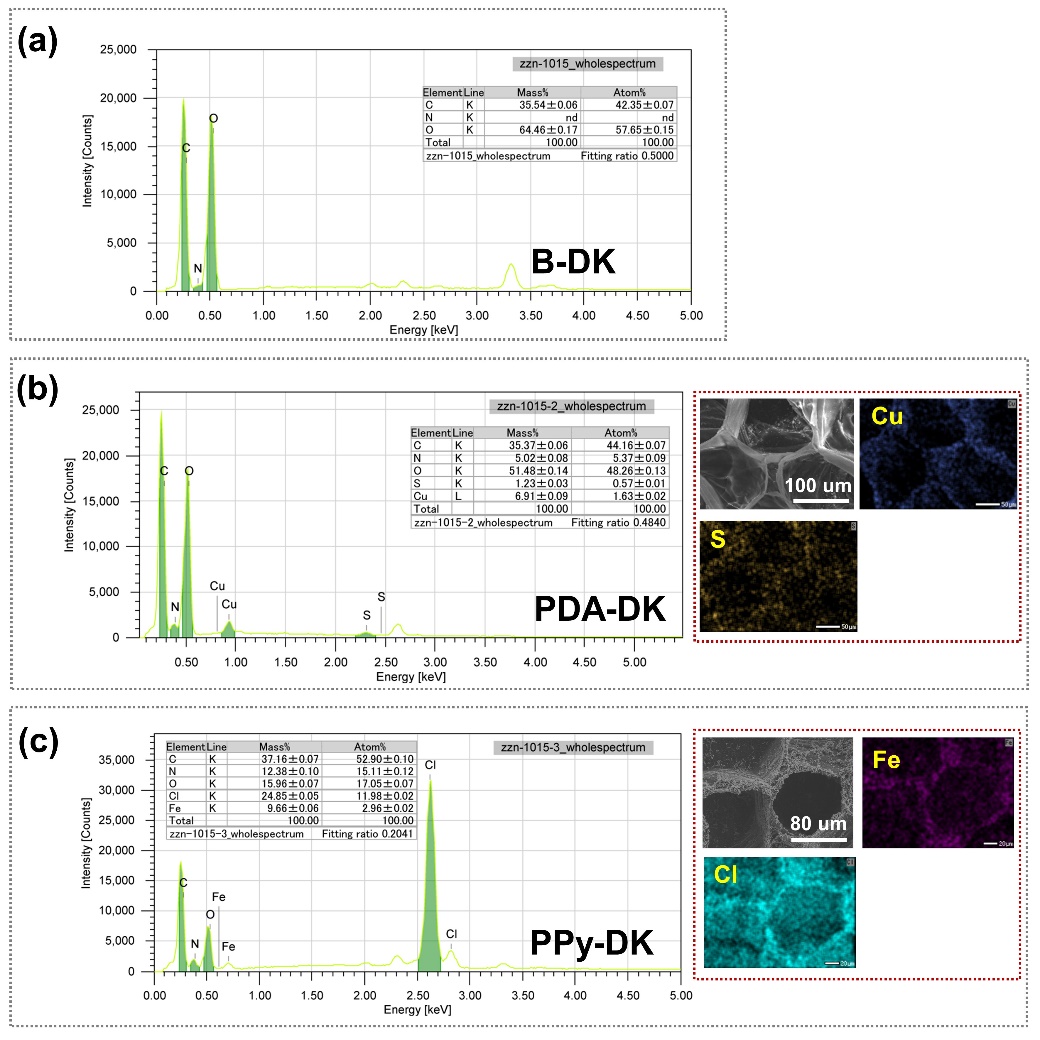


**Figure S3**. (a) The energy dispersive X-ray (EDX) spectroscopy B-DK; (b) the EDX spectroscopy and element mapping of PDA-DK; (c) the EDX spectroscopy and element mapping of PPy-DK.


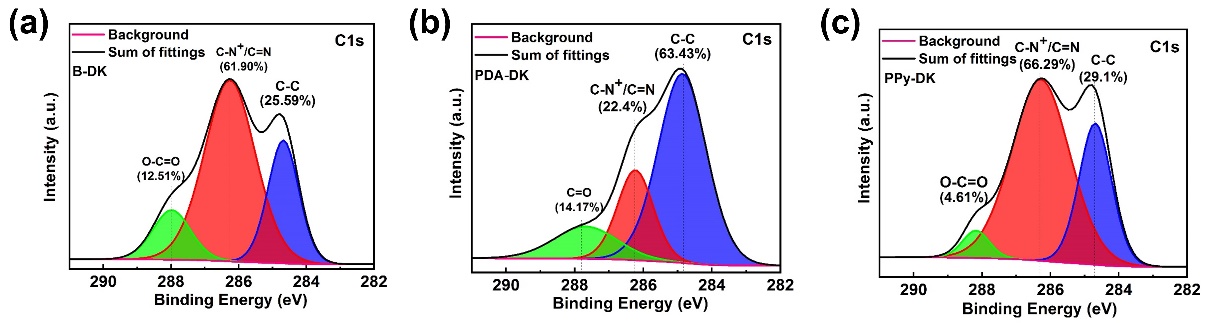


**Figure S4**. The high-resolution C 1s spectra of (a) B-DK; (b) PDA-DK; (c) PPy-DK.

**Calculation equation of UV–Vis–NIR of B-DK, PDA-DK and PPy-DK**

The solar absorption ability of B-DK, PDA-DK and PPy-DK is calculated through the following equation [S1,S2]:

*A* = [ʃ(1– *R*)·*S*·*dλ*] / [*S*·*dλ*]

*A* stands for the solar absorption, *R* represents the reflectance. *S* is solar spectral irradiance (W m–2 nm–1). *λ* denotes the wavelength (nm).

**Table S1**. Proportion of light absorption in different spectral regions (300 – 2500 nm)

| Sample | Total  absorption | UV  (300 – 400 nm) | Visible  (401 – 760 nm) | Infrared  (761 – 2500 nm) |
| --- | --- | --- | --- | --- |
| Solar spectrum | 100.00% | 3.62% | 51.44% | 44.94% |
| B-DK | 33.13% | 2.00% | 16.83% | 14.30% |
| PDA-DK | 85.63% | 3.45% | 48.16% | 34.02% |
| PPy-DK | 98.11% | 3.58% | 50.90% | 43.63% |

**Calculation equation of photothermal conversion efficiency (*η*)**

The solar energy conversion efficiency (*η*) is calculated through the following equations [S3,S4]:

*η* = *m*(*H*LV + *Q*)/*I*; *H*LV = 1.91846 × 106[*T*1/(*T*1－33.91)]2; *Q* = *c*(*T*1－*T*0)

Where *m* is the net water evaporation rate (kg m–2 h–1). *H*LV is the liquid-vapor phase change enthalpy. *Q* is the sensible heat (J kg–1). *I* stands for the power density of solar illumination. *T*1 is the temperature of evaporation (K), *T*0 is the initial temperature of the water, *c* is the specific heat capacity of bulk water (4.2 J g–1 K–1).


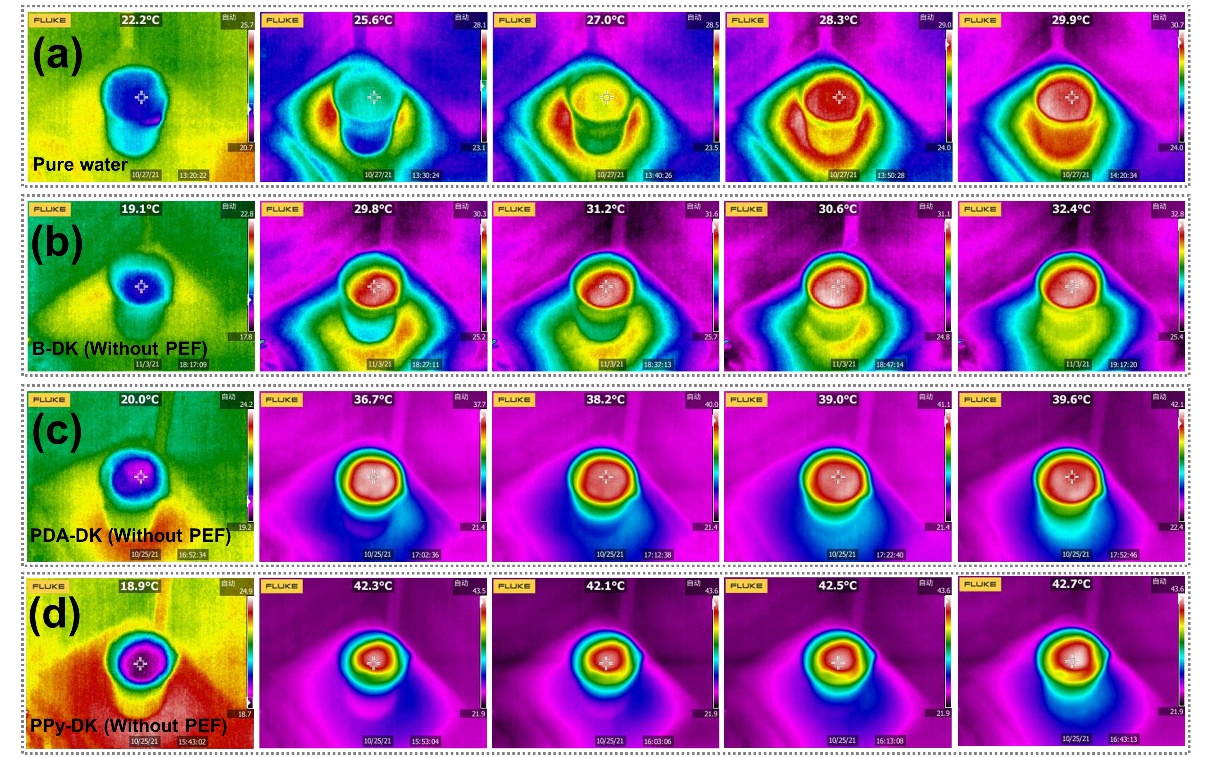


**Figure S5.** (a) IR images of pure water; (b) IR images of B-DK (without PEF); (c) IR images of PDA-DK (without PEF); (d) IR images of PPy-DK (without PEF) at 0, 10, 20, 30 and 60 mins, respectively.


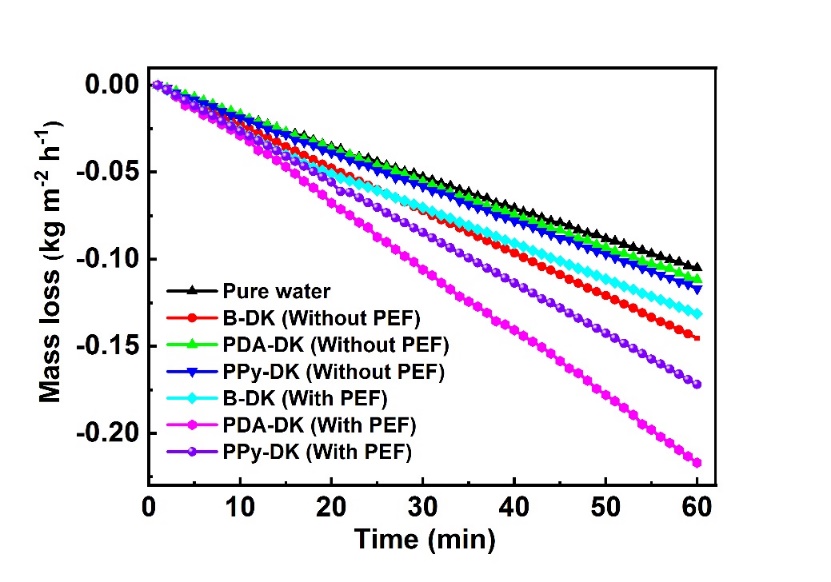


**Figure S6.** The dark field evaporation rates of pure water, B-DK (Without PEF), PDA-DK (Without PEF), PPy-DK (Without PEF), B-DK (With PEF), PDA-DK (With PEF) and PPy-DK (With PEF), respectively.

**Table S2. Comparison of solar steam generation performance of PDA-DK with some previously reported PDA coated photothermal materials under 1-sun illumination**

| Entry | Photothermal material | Evaporation rate  (kg m-2 h-1) | Reference in S.I. |
| --- | --- | --- | --- |
| 1 | PDA-based bacterial nanocellulose | 1.00 | [S5] |
| 2 | PDA-based cellulose aerogel | 1.36 | [S6] |
| 3 | Ag-PDA@Wood | 1.58 | [S7] |
| 4 | PDA-carbon black-based PP non-woven fabric | 1.68 | [S8] |
| 5 | PDA-RGO-PTFE film | 1.45 | [S9] |
| 6 | Ag-PDA@Wooden flower | 2.08 | [S10] |
| 7 | PDA-DK | 1.50 | This Work |

**Table S3. Comparison of solar steam generation performance of PPy-DK with some previously reported PPy coated photothermal materials under 1-sun illumination**

| Entry | Photothermal material | Evaporation rate  (kg m-2 h-1) | Reference in S.I. |
| --- | --- | --- | --- |
| 1 | PPy-Wood | 1.33 | [S11] |
| 2 | PPy-Sponge | 1.45 | [S12] |
| 3 | PPy-based melamine foam | 1.57 | [S13] |
| 4 | PPy-based sugarcane | 1.59 | [S14] |
| 5 | PPy-based polyvinyl alcohol | 1.68 | [S15] |
| 6 | PPy-paper | 1.38 | [S16] |
| 7 | PPy-based natural latex | 1.76 | [S17] |
| 8 | PPy-based sunflower discs | 1.74 | [S18] |
| 9 | PPy-DK | 1.60 | This Work |

**
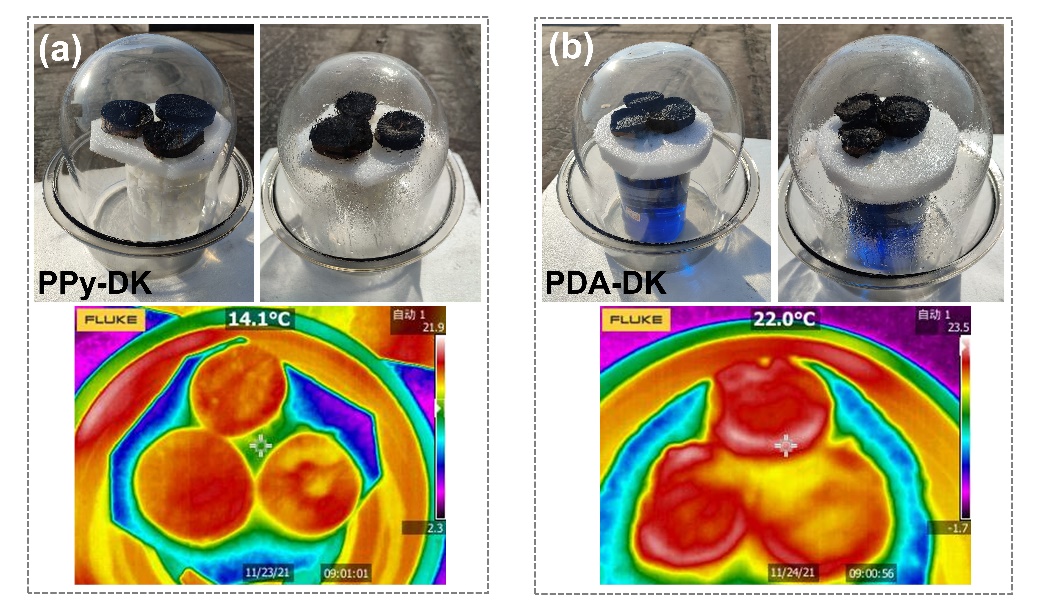
**

**Figure S7**. (a) Outdoor experiment of PPy-DK for desalination; (b) Outdoor experiments of PDA-DK for purification dyeing wastewater (methyl blue solution 20 mg L–1).

**References**

[S1] M. Ye, J. Jia, Z. Wu, C. Qian, R. Chen, P.G. O'Brien, W. Sun, Y. Dong, G.A. Ozin, Synthesis of black TiOx nanoparticles by Mg reduction of TiO2 nanocrystals and their application for solar water evaporation, Adv. Energy Mater. 7 (2017) 1601811-1601817, <https://doi.org/10.1002/aenm.201601811>.

[S2] T. Lin, C. Yang, Z. Wang, H. Yin, X. Lü, F. Huang, J. Lin, X. Xie, M. Jiang, Effective nonmetal incorporation in black titania with enhanced solar energy utilization, Energy Enviro. Sci. 7 (2014) 967-972, <https://doi.org/10.1039/c3ee42708k>.

[S3] X. Li, R. Lin, G. Ni, N. Xu, X. Hu, B. Zhu, G. Lv, J. Li, S. Zhu, J. Zhu, Three-dimensional artificial transpiration for efficient solar waste-water treatment, Nat. Sci. Rev. 5 (2018) 70-77, <https://doi.org/10.1093/nsr/nwx051>.

[S4] X. Li, J. Li, J. Lu, N. Xu, C. Chen, X. Min, B. Zhu, H. Li, L. Zhou, S. Zhu, T. Zhang, J. Zhu, Enhancement of Interfacial solar vapor generation by environmental energy, Joule 2 (2018) 1331-1338, <https://doi.org/10.1016/j.joule.2018.04.004>.

[S5] X. Wu, S. Cao, D. Ghim, Q. Jiang, S. Singamaneni, Y.S. Jun, A thermally engineered polydopamine and bacterial nanocellulose bilayer membrane for photothermal membrane distillation with bactericidal capability, Nano Energy 79 (2021) 105353-105363, <https://doi.org/10.1016/j.nanoen.2020.105353>.

[S6] Y. Zou, J. Zhao, J. Zhu, X. Guo, P. Chen, G. Duan, X. Liu, Y. Li, A mussel-inspired polydopamine-filled cellulose aerogel for solar-enabled water remediation, ACS Appl. Mater. Interfaces 13 (2021) 7617-7624, <https://doi.org/10.1021/acsami.0c22584>.

[S7] J. Yang, Y. Chen, X. Jia, Y. Li, S. Wang, H. Song, Wood-based solar interface evaporation device with self-desalting and high antibacterial activity for efficient solar steam generation, ACS Appl. Mater. Interfaces 12 (2020) 47029-47037, <https://doi.org/10.1021/acsami.0c14068>.

[S8] S. Sun, B. Sun, Y. Wang, M. Fordjour Antwi-Afari, H.Y. Mi, Z. Guo, C. Liu, C. Shen, Carbon black and polydopamine modified non-woven fabric enabling efficient solar steam generation towards seawater desalination and wastewater purification, Sep. Purif. Technol. 278 (2021) 119621-119631, <https://doi.org/10.1016/j.seppur.2021.119621>.

[S9] B. Bai, X. Yang, R. Tian, X. Wang, H. Wang, A high efficiency solar steam generation system with using residual heat to enhance steam escape, Desalination 491 (2020) 114382-114391, <https://doi.org/10.1016/j.desal.2020.114382>.

[S10] S. Chen, Z. Sun, W. Xiang, C. Shen, Z. Wang, X. Jia, J. Sun, C.J. Liu, Plasmonic wooden flower for highly efficient solar vapor generation, Nano Energy 76 (2020) 104998-105007, <https://doi.org/10.1016/j.nanoen.2020.104998>.

[S11] W. Huang, G. Hu, C. Tian, X. Wang, J. Tu, Y. Cao, K. Zhang, Nature-inspired salt resistant polypyrrole–wood for highly efficient solar steam generation, Sustain. Energy Fuels 3 (2019) 3000-3008, <https://doi.org/10.1039/c9se00163h>.

[S12] Y. Fan, W. Bai, P. Mu, Y. Su, Z. Zhu, H. Sun, W. Liang, A. Li, Conductively monolithic polypyrrole 3-D porous architecture with micron-sized channels as superior salt-resistant solar steam generators, Sol. Energy Mater. Sol. Cells 206 (2020) 110347-110355, <https://doi.org/10.1016/j.solmat.2019.110347>.

[S13] C. Li, D. Jiang, B. Huo, M. Ding, C. Huang, D. Jia, H. Li, C.Y. Liu, J. Liu, Scalable and robust bilayer polymer foams for highly efficient and stable solar desalination, Nano Energy 60 (2019) 841-849, <https://doi.org/10.1016/j.nanoen.2019.03.087>.

[S14] C. Xiao, L. Chen, P. Mu, J. Jia, H. Sun, Z. Zhu, W. Liang, A. Li, Sugarcane-Based Photothermal Materials for Efficient Solar Steam Generation, ChemistrySelect 4 (2019) 7891-7895, <https://doi.org/10.1002/slct.201901889>.

[S15] B. Wen, X. Zhang, Y. Yan, Y. Huang, S. Lin, Y. Zhu, Z. Wang, B. Zhou, S. Yang, J. Liu, Tailoring polypyrrole-based Janus aerogel for efficient and stable solar steam generation, Desalination 516 (2021) 115228-115237, <https://doi.org/10.1016/j.desal.2021.115228>.

[S16] X. Wang, Q. Liu, S. Wu, B. Xu, H. Xu, Multilayer polypyrrole nanosheets with self-organized surface structures for flexible and efficient solar-thermal energy conversion, Adv. Mater. 31 (2019) e1807716-e1807714, <https://doi.org/10.1002/adma.201807716>.

[S17] Y. Xu, J. Wang, F. Yu, Z. Guo, H. Cheng, J. Yin, L. Yan, X. Wang, Flexible and efficient solar thermal generators based on polypyrrole coated natural latex foam for multimedia purification, ACS Sustainable Chem. Eng. 8 (2020) 12053-12062, <https://doi.org/10.1021/acssuschemeng.0c03164>.

[S18] Y. Chen, G. Zhao, L. Ren, H. Yang, X. Xiao, W. Xu, Blackbody-inspired array structural polypyrrole-sunflower disc with extremely high light absorption for efficient photothermal evaporation, ACS Appl. Mater. Interfaces 12 (2020) 46653-46660, <https://doi.org/10.1021/acsami.0c11549>.
